# Supplementary material for: Evaluation of the Potential Release Tendency of Metals and Metalloids from the Estuarine Sediments: Case Study of Raša Bay
Source: MDPI journal article supplement (doi:10.3390/molecules26216656), 2021-11-03
Supplement: s1 [file s1]

**Table S1.** Calculated enrichment factors (EF) and geoaccumulation indices ( $I_{geo}$ ) for the sediments studied. Values marked in bold indicate moderate enrichment (EF = 2-5) or describe the sediments as uncontaminated to moderately contaminated ( $I_{geo}$  = 0-1) or moderately contaminated ( $I_{geo}$  = 1-2). Values marked in red indicate considerable enrichment (EF = 2-5) of the sediments.

|           | EF         |            |            | $I_{geo}$  |            |            |
|-----------|------------|------------|------------|------------|------------|------------|
|           | Site 1     | Site 2     | Site 3     | Site 1     | Site 2     | Site 3     |
| <b>Al</b> | 1.0        | 1.0        | 1.0        | -0.9       | -1.3       | -1.2       |
| <b>As</b> | 0.9        | 1.1        | 1.0        | -1.1       | -1.1       | -1.1       |
| <b>Ba</b> | 1.0        | 1.1        | 1.2        | -0.9       | -1.1       | -1.0       |
| <b>Be</b> | 1.5        | 1.5        | 1.4        | -0.4       | -0.6       | -0.7       |
| <b>Cd</b> | 1.1        | 1.0        | 0.9        | -0.8       | -1.3       | -1.4       |
| <b>Co</b> | <b>2.1</b> | <b>2.2</b> | <b>2.1</b> | <b>0.2</b> | -0.1       | -0.1       |
| <b>Cr</b> | <b>2.5</b> | <b>2.7</b> | <b>2.9</b> | <b>0.4</b> | <b>0.2</b> | <b>0.3</b> |
| <b>Cs</b> | 1.2        | 1.1        | 1.0        | -0.6       | -1.2       | -1.2       |
| <b>Cu</b> | 1.8        | 1.6        | 1.5        | 0.0        | -0.6       | -0.6       |
| <b>Fe</b> | 1.0        | 1.0        | 0.9        | -0.9       | -1.2       | -1.3       |
| <b>Li</b> | 1.5        | 1.4        | 1.4        | -0.4       | -0.7       | -0.8       |
| <b>Mn</b> | 1.6        | <b>2.1</b> | <b>2.0</b> | -0.2       | -0.2       | -0.2       |
| <b>Mo</b> | <b>3.9</b> | <b>2.0</b> | 1.5        | <b>1.1</b> | -0.2       | -0.6       |
| <b>Ni</b> | <b>4.3</b> | <b>4.1</b> | <b>4.0</b> | <b>1.2</b> | <b>0.8</b> | <b>0.8</b> |
| <b>Pb</b> | 1.1        | 1.4        | 1.4        | -0.7       | -0.8       | -0.7       |
| <b>Rb</b> | 1.7        | 1.6        | 1.5        | -0.2       | -0.6       | -0.6       |
| <b>Sb</b> | 0.7        | 0.5        | 0.4        | -1.4       | -2.2       | -2.4       |
| <b>Se</b> | -          | -          | -          | -          | -          | -          |
| <b>Sn</b> | 0.2        | 0.1        | 0.1        | -3.3       | -4.3       | -4.8       |
| <b>Sr</b> | <b>3.9</b> | 5.1        | <b>4.9</b> | <b>1.1</b> | <b>1.1</b> | <b>1.1</b> |
| <b>Ti</b> | 1.0        | 1.1        | 1.1        | -0.9       | -1.1       | -1.1       |
| <b>Tl</b> | 1.0        | 0.9        | 0.9        | -0.9       | -1.4       | -1.4       |
| <b>U</b>  | 1.1        | 1.5        | 1.0        | -0.8       | -0.6       | -1.2       |
| <b>V</b>  | 1.6        | 1.7        | 1.5        | -0.2       | -0.5       | -0.7       |
| <b>Zn</b> | 1.6        | 1.5        | <b>2.1</b> | -0.2       | -0.7       | -0.2       |

**Table S2.** Longitude and latitude data for the sampling locations, including the depth of the water column at those locations.

|               | Longitude       | Latitude        | Depth |
|---------------|-----------------|-----------------|-------|
| <b>Site 1</b> | 45° 2' 11.7" N  | 14° 2' 47.76" E | 30 cm |
| <b>Site 2</b> | 45° 2' 0.18" N  | 14° 2' 50.28" E | 40 cm |
| <b>Site 3</b> | 45° 1' 51.54" N | 14° 2' 48.18" E | 35 cm |
